# Supplementary material for: Walnut Consumption for Two Years and Leukocyte Telomere Attrition in Mediterranean Elders: Results of a Randomized Controlled Trial
Source: PubMed Central journal article supplement (PMC6316673; doi:10.3390/nu10121907), 2018-12-04
Supplement: nutrients-10-01907-s001.pdf [file nutrients-10-01907-s001.pdf]

Supplementary material of **“Walnut consumption for two years and leukocyte telomere attrition in Mediterranean elders: results of a randomized controlled trial”** by Tania-Marisa Freitas-Simoes et al.

**eFigure 1.** Flow-chart of the study

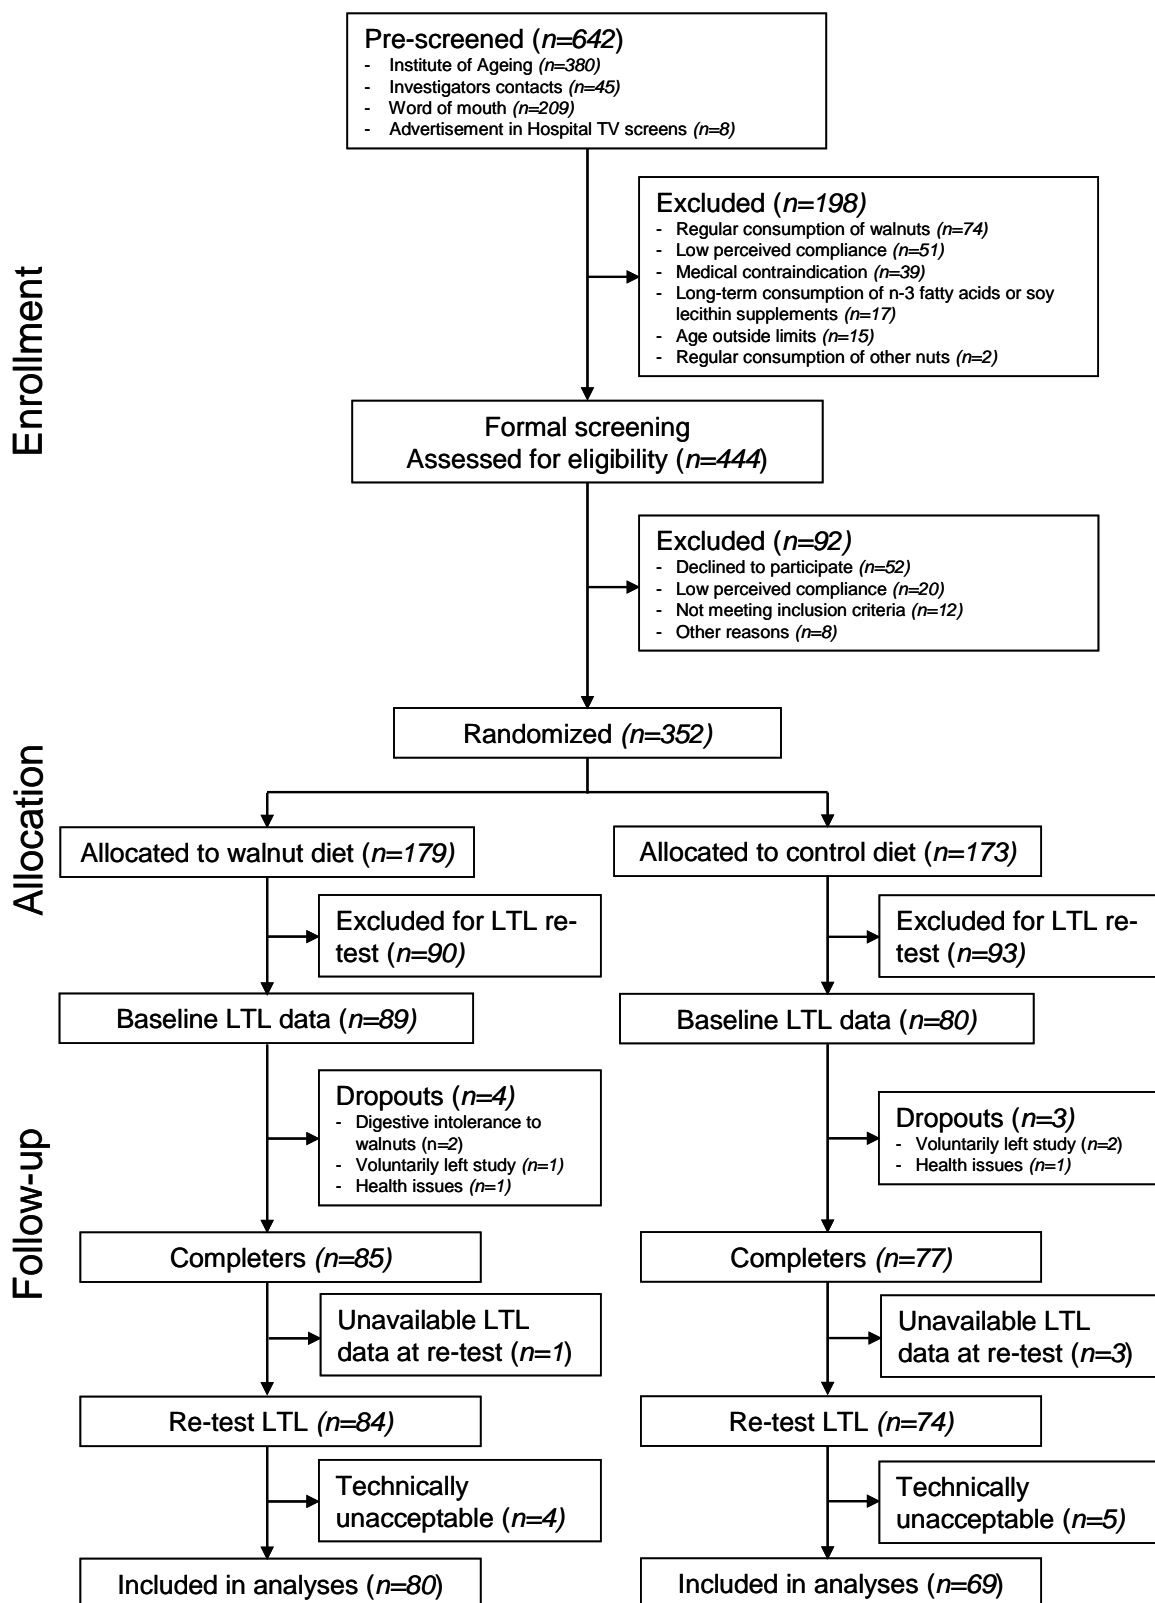

**eFigure 2.** Changes in LTL in all participants from the two groups after 2 years of intervention.

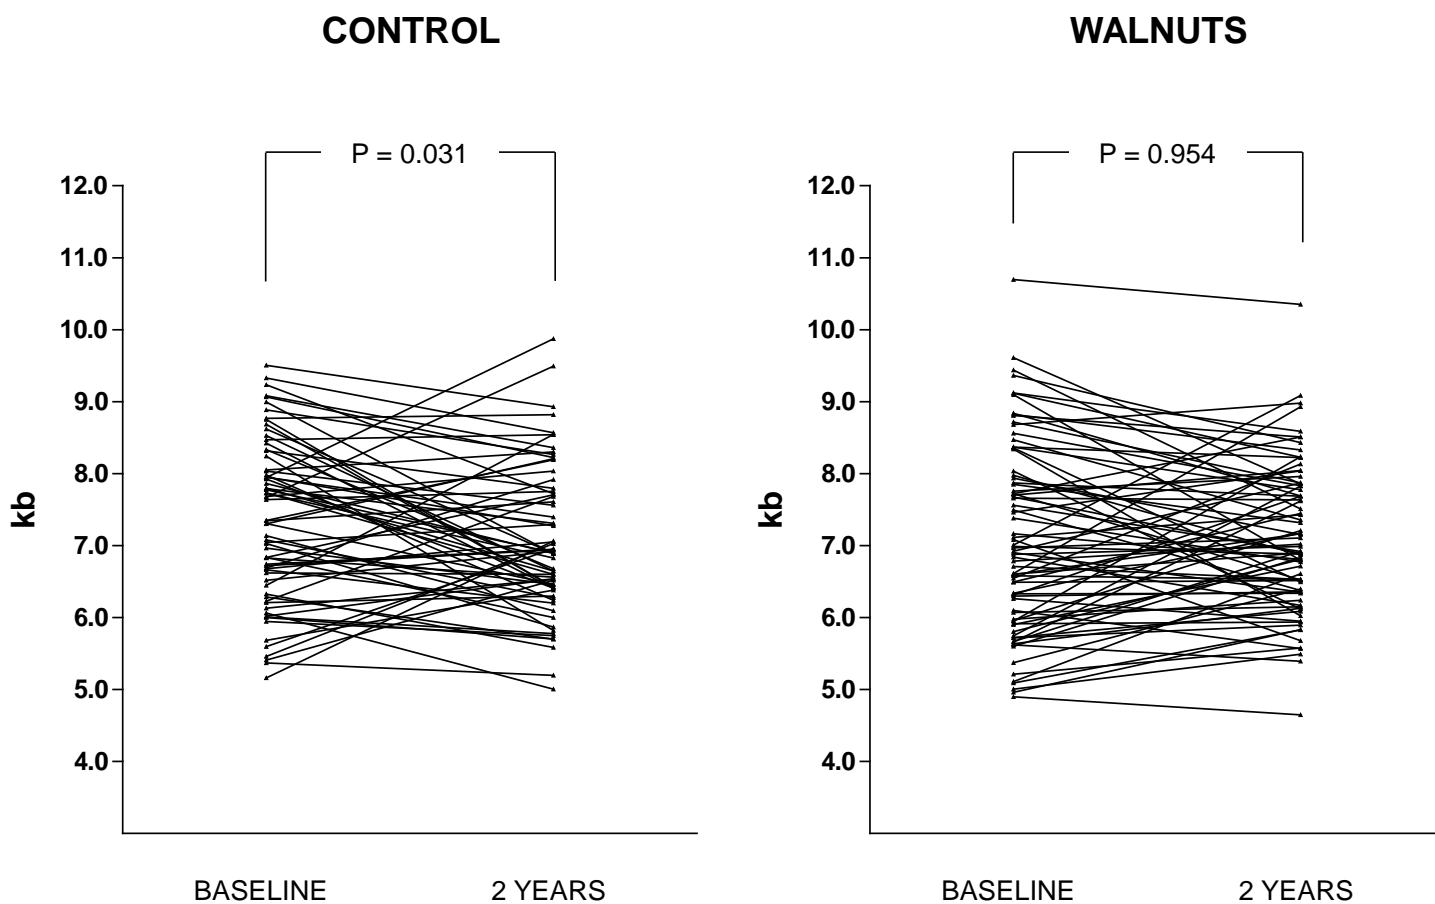

Comparisons between before and after the intervention (P obtained by repeated-measures ANCOVA with age, gender, and smoking in pack-years as covariates).

**eTable 1.** Baseline and 2 year red blood cell proportions of selected fatty acids by intervention group.

|                         | Visit    | Walnut group<br>(n = 80) | Control group<br>(n = 69) | P *    |
|-------------------------|----------|--------------------------|---------------------------|--------|
| C14:0                   | Baseline | 1.67 (1.35 to 1.99)      | 1.56 (1.21 to 1.91)       | 0.737  |
|                         | 2 year   | 1.78 (1.63 to 1.94)      | 1.76 (1.60 to 1.93)       |        |
| C16:0                   | Baseline | 20.33 (20.11 to 20.55)   | 20.50 (20.27 to 20.74)    | 0.474  |
|                         | 2 year   | 20.34 (20.18 to 20.51)   | 20.65 (20.47 to 20.82)    |        |
| C16:1n-7 cis            | Baseline | 0.64 (0.59 to 0.68)      | 0.60 (0.55 to 0.64)       | 0.004  |
|                         | 2 year   | 0.52 (0.45 to 0.59)      | 0.63 (0.56 to 0.71)       |        |
| C18:0                   | Baseline | 14.73 (14.38 to 15.08)   | 15.09 (14.72 to 15.47)    | 0.028  |
|                         | 2 year   | 13.87 (13.58 to 14.16)   | 13.49 (13.17 to 13.80)    |        |
| C18:1n-9 cis            | Baseline | 18.36 (17.99 to 18.73)   | 18.15 (17.75 to 18.55)    | <0.001 |
|                         | 2 year   | 15.77 (15.50 to 16.04)   | 16.74 (16.45 to 17.03)    |        |
| C18:2n-6                | Baseline | 12.68 (12.31 to 13.05)   | 12.98 (12.58 to 13.38)    | <0.001 |
|                         | 2 year   | 15.52 (15.13 to 15.92)   | 14.15 (13.72 to 14.57)    |        |
| C20:0                   | Baseline | 0.22 (0.21 to 0.24)      | 0.24 (0.23 to 0.25)       | 0.073  |
|                         | 2 year   | 0.14 (0.14 to 0.15)      | 0.15 (0.14 to 0.15)       |        |
| C20:2n-6                | Baseline | 0.28 (0.26 to 0.29)      | 0.29 (0.27 to 0.30)       | <0.001 |
|                         | 2 year   | 0.41 (0.38 to 0.45)      | 0.32 (0.28 to 0.36)       |        |
| C20:3n-6                | Baseline | 1.63 (1.57 to 1.70)      | 1.77 (1.70 to 1.84)       | <0.001 |
|                         | 2 year   | 1.61 (1.54 to 1.69)      | 1.87 (1.79 to 1.95)       |        |
| C20:4n-6                | Baseline | 15.39 (15.06 to 15.72)   | 14.92 (14.56 to 15.28)    | 0.049  |
|                         | 2 year   | 16.11 (15.75 to 16.48)   | 16.14 (15.74 to 16.53)    |        |
| C20:5n-3                | Baseline | 0.92 (0.74 to 1.10)      | 0.79 (0.60 to 0.98)       | 0.682  |
|                         | 2 year   | 0.90 (0.83 to 0.98)      | 0.83 (0.75 to 0.91)       |        |
| C22:4n-6                | Baseline | 2.23 (2.13 to 2.33)      | 2.18 (2.07 to 2.29)       | 0.179  |
|                         | 2 year   | 2.37 (2.26 to 2.48)      | 2.39 (2.28 to 2.51)       |        |
| C22:5n-3                | Baseline | 1.60 (1.54 to 1.66)      | 1.61 (1.55 to 1.68)       | <0.001 |
|                         | 2 year   | 2.01 (1.94 to 2.07)      | 1.68 (1.62 to 1.76)       |        |
| C22:6n-3                | Baseline | 5.07 (4.88 to 5.25)      | 5.02 (4.82 to 5.22)       | <0.001 |
|                         | 2 year   | 5.01 (4.84 to 5.19)      | 5.43 (5.24 to 5.62)       |        |
| Ratio n-6 PUFA:n-3 PUFA | Baseline | 4.41 (4.21 to 4.60)      | 4.45 (4.24 to 4.66)       | 0.281  |
|                         | 2 year   | 4.50 (4.32 to 4.67)      | 4.44 (4.25 to 4.63)       |        |

Data are means (95% CIs). PUFA, polyunsaturated fatty acids.

\* Interaction between time (baseline vs. retest) and intervention (control vs. walnut), obtained by two-way repeated measures ANOVA.
